# Supplementary material
Source: publisher figshare collection journal article supplement (https://acs.figshare.com/ndownloader/files/3911161)
Supplement: Supplementary file 1 [file 3911161]

# SUPPORTING INFORMATION

## **A Novel Fe<sub>3</sub>O<sub>4</sub>@ZnO@mSiO<sub>2</sub> Nanocarrier for Targeted Drug Delivery and Controllable Release with Microwave Irradiation**

*Hongjin Qiu, Bin Cui\*, Guangming Li, Jianhui Yang, Hongxia Peng, Yingsai Wang,*

*Nini Li, Ruicheng Gao, Zhuguo Chang, Yaoyu Wang*

Key Laboratory of Synthetic and Natural Functional Molecule Chemistry (Ministry of Education), Shaanxi Key Laboratory of Physico-Inorganic Chemistry, School of Chemistry & Materials Science, Northwest University, Xi'an 710069, PR China

\* Corresponding author: E-mail: cuibin@nwu.edu.cn; Tel.: +86 029 8830-2129; fax: +86 029 8830-3798

Stability properties of the nanocarriers were studied in a Zetasizer Nano-ZS90, from Malvern Instruments.

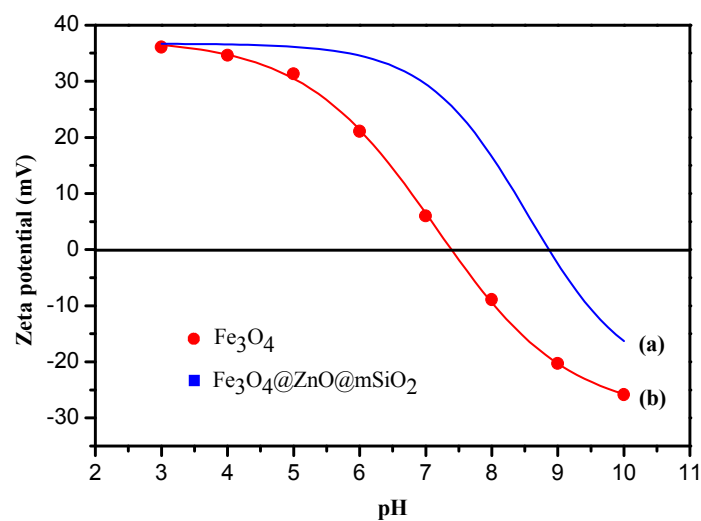

Figure 1. Zeta potential of (a)  $\text{Fe}_3\text{O}_4$  and (b)  $\text{Fe}_3\text{O}_4@\text{ZnO}@\text{mSiO}_2$

| Sample                                           | mean particle size by SEM (nm) | hydrodynamic size at pH 5 (nm) | hydrodynamic size at pH 6 (nm) | hydrodynamic size at pH 7 (nm) |
|--------------------------------------------------|--------------------------------|--------------------------------|--------------------------------|--------------------------------|
| $\text{Fe}_3\text{O}_4$                          | 170                            | 179.7                          | 188.2                          | 197.5                          |
| $\text{Fe}_3\text{O}_4@\text{ZnO}$               | 210                            | 211.3                          | 227.8                          | 229.1                          |
| $\text{Fe}_3\text{O}_4@\text{ZnO}@\text{mSiO}_2$ | 260                            | 275.6                          | 279.4                          | 286.8                          |

Table 1. Experimental Results on Mean Particle Sizes Measured by SEM, Hydrodynamic Sizes at pH 5, pH 6 and pH 7 by DLS.

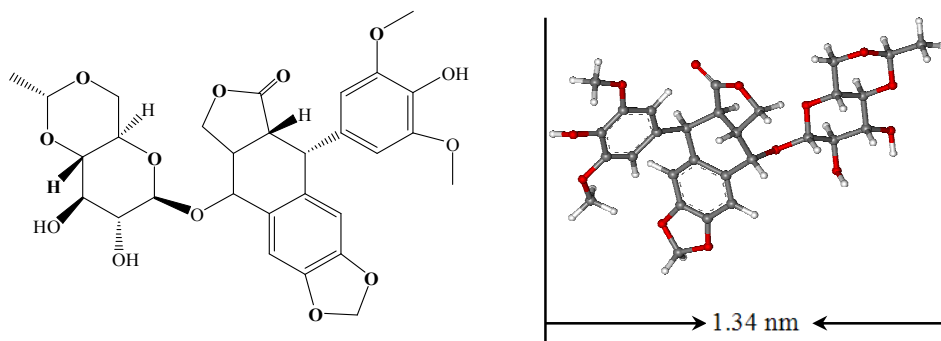

Figure 2. Molecular formula of etoposide (VP16).
